1 *Title page*

2 Title: Conserved patterns of alternative splicing in response to cold acclimation in fish

3

4 Running head: Cold acclimation and mRNA splicing

5

6 Authors: Timothy M. Healy<sup>ab\*</sup> and Patricia M. Schulte<sup>a</sup>

7

8 Author affiliations:

9 <sup>a</sup> The University of British Columbia, Department of Zoology, 6270 University

10 Boulevard, Vancouver, British Columbia, Canada, V6T 1Z4

11 <sup>b</sup> Current address: Marine Biology Research Division, Scripps Institution of

12 Oceanography, University of California San Diego, 9500 Gilman Drive #0202, La Jolla,

13 CA, USA, 92093-0202

14

15 Corresponding author:

16 Timothy M. Healy

17 email: [tmhealy@ucsd.edu](mailto:tmhealy@ucsd.edu)

18

19 Keywords: temperature, differential exon usage, phenotypic plasticity, killifish,

20 stickleback, zebrafish

21

22 Summary statement:

23 Qualitative changes in gene expression, such as those mediated by alternative splicing of

24 mRNAs, are involved in phenotypic plasticity in response to prolonged cold acclimation

25 in ectothermic animals

26

27 **List of abbreviations**

28 Alternatively spliced – AS

29 Basic local alignment search tool – BLAST

30 Differentially expressed – DE

31 European Bioinformatics Institute – EBI

32 Gene ontology – GO

33 General feature format – GFF

34 National Center for Biotechnology Information – NCBI

35 Sequence Read Archive – SRA

36

37 **Abstract**

38 Phenotypic plasticity is an important aspect of an organism's response to  
39 environmental change that often requires the modulation of gene expression. These  
40 changes in gene expression can be quantitative as a result of increases or decreases in the  
41 amounts of specific transcripts, or qualitative as a result of the expression of alternative  
42 transcripts from the same gene (e.g., via alternative splicing of pre-mRNAs). Although  
43 the role of quantitative changes in gene expression in phenotypic plasticity is well known,  
44 relatively few studies have examined the role of qualitative changes. Here, we use  
45 skeletal muscle RNA-seq data from Atlantic killifish (*Fundulus heteroclitus*), threespine  
46 stickleback (*Gasterosteus aculeatus*) and zebrafish (*Danio rerio*) to investigate the extent  
47 of qualitative changes in gene expression in response to cold. Fewer genes demonstrated  
48 alternative splicing than differential expression as a result of cold acclimation; however,  
49 differences in splicing were detected for between 426 and 866 genes depending on  
50 species, indicating that large numbers of qualitative changes in gene expression are  
51 associated with cold acclimation. Many of these alternatively spliced genes were also  
52 differentially expressed, and there was functional enrichment for involvement in muscle  
53 contraction among the genes demonstrating qualitative changes in response to cold  
54 acclimation. Additionally, there was a common group of 29 genes with cold-acclimation-  
55 mediated changes in splicing in all three species, suggesting that there may be a  
56 conserved set of genes with expression patterns that respond qualitatively to prolonged  
57 cold temperatures across fishes.

## 58 **Introduction**

59 Phenotypic plasticity, which is the ability of organisms to express  
60 environmentally mediated alternative phenotypes without genetic change (e.g., Travis,  
61 1994; West-Eberhard, 2003), plays a critical role in determining organismal responses to  
62 a changing environment (e.g., Schulte et al., 2011). For example, reversible metabolic  
63 plasticity in ectotherms has the potential to increase resilience to anthropogenic climate  
64 change (Seebacher et al., 2015). One of the primary mechanisms underlying this  
65 phenotypic plasticity is thought to be changes in gene expression (Schlichting and  
66 Pigliucci, 1993; Schlichting and Smith, 2002), which can occur in one of two general  
67 ways: (1) quantitative changes in which the transcripts of a gene increase or decrease in  
68 number in the cell, or (2) qualitative changes in which the nature of the transcripts being  
69 expressed changes as a result of mechanisms such as alternative mRNA splicing or RNA  
70 editing (Schlichting and Pigliucci, 1993; Gerber and Keller, 2001; Hochachka et al.,  
71 2001; Schlichting and Smith, 2002; Schulte, 2004; Rosenthal, 2015). Quantitative  
72 changes in gene expression in response to environmental change have been widely  
73 studied (e.g., Gracey et al., 2004; Buckley et al., 2006; Garcia et al., 2012; Moya et al.,  
74 2012; Schoville et al., 2012; Zhao et al., 2012; Mandic et al., 2014), whereas, despite  
75 previous suggestions that qualitative changes are likely also an important mechanism  
76 underlying plasticity (Hochachka et al., 2001; Schulte, 2004), surprisingly little is known  
77 about qualitative mRNA responses to environmental stressors in animals (Somero, 2018).

78 Some evidence for the potential importance of qualitative changes in gene  
79 expression comes from studies of the phenomenon of RNA editing, in which there is  
80 enzymatic conversion of individual bases within a transcript that result in changes in the  
81 amino acid sequence of the subsequently translated protein (Nisihikura, 2016; Montiel-  
82 Gonzalez et al., 2016). For example, it has been shown that differences in RNA editing of  
83 voltage-gated potassium channels between tropical and polar Octopus species results in  
84 channels with functional properties suitable for their different habitats (Garrett and  
85 Rosenthal, 2012), suggesting that RNA editing provides a mechanism allowing  
86 environmental adaptation. However, the role of RNA editing in plasticity has not been  
87 well studied (Rosenthal, 2015), and RNA editing appears to be relatively rare in animal  
88 taxa other than cephalopods (Liscovitch-Brauer et al., 2018). In contrast, alternative

89 splicing, a process in which different mature transcripts are produced from a single gene  
90 (Modrek and Lee, 2002), is widespread across taxa (Tapial et al., 2017), and thus has the  
91 potential to be a common mechanism underlying phenotypic plasticity in many species.  
92 Alternative splicing in the response to environmental stress is widely observed in plants  
93 (Reddy et al., 2013; Capovilla et al., 2015; Filichkin et al., 2015; Thatcher et al., 2015;  
94 Calixto et al., 2018), but this mechanism has rarely been examined in animals (although  
95 see Polley et al., 2003; Huang et al., 2016; Jakšić and Schlötterer, 2016; Hopkins et al.,  
96 2018; Tan et al., 2018; Xia et al., 2018), and much remains unknown about its  
97 importance.

98 Plasticity in response to chronic cold temperature is a particularly promising  
99 avenue to investigate the potential role of qualitative changes in gene expression in  
100 regulating reversible phenotypic change. Alternatively spliced variants of  $\Delta 9$ -acyl CoA  
101 desaturase with temperature-sensitive expression patterns have been detected in common  
102 carp, *Cyprinus carpio* Linnaeus (Polley et al., 2003), and many transcriptomic studies  
103 examining quantitative changes in gene expression as a result of acclimation to low  
104 temperature have observed two key findings: (1) there is generally bias for up-regulation  
105 of gene expression as a result of cold acclimation, and (2) there are generally functional  
106 enrichments for gene expression and RNA splicing in the genes that are differentially  
107 expressed in response to chronic cold temperatures (e.g., Gracey et al., 2004; Long et al.,  
108 2012, 2013; Scott and Johnston, 2012; Rebl et al., 2013; Bilyk and Cheng, 2014; Mininni  
109 et al., 2014; Morris et al., 2014; Liang et al., 2015; Healy et al., 2017; Metzger and  
110 Schulte, 2018). Moreover, these enrichments are often the most well supported  
111 enrichments statistically, suggesting changes in gene expression and splicing are key  
112 aspects of organismal responses when acclimated to low temperatures. However, splicing  
113 of mRNA transcripts is a normal component of RNA processing (e.g., Papasaikas and  
114 Valcárcel, 2016), and because cold acclimation typically results in up-regulation of gene  
115 expression overall, functional enrichment for genes involved in RNA splicing could  
116 simply be a consequence of up-regulated gene expression in general without substantial  
117 changes in splicing patterns or qualitative mRNA expression. Therefore, although  
118 changes in pre-mRNA splicing are promising candidate mechanisms for the basis of

119 phenotypic plasticity, the extent to which splicing patterns vary in response to chronic  
120 temperature change in ectothermic animals remains unknown (Somero, 2018).

121 The lack of studies addressing temperature-mediated qualitative changes in gene  
122 expression is somewhat surprising, because data collected by RNA-seq, including those  
123 from previous studies, are amenable for the analysis of changes in splicing patterns or  
124 differential exon usage, and modifications of standard RNA-seq analysis packages that  
125 enable tests for differential exon usage are publically available (e.g., Anders et al., 2012).  
126 In the current study, we take advantage of previously published studies in three species of  
127 fish: Atlantic killifish (*Fundulus heteroclitus* Linnaeus; Healy et al., 2017), threespine  
128 stickleback (*Gasterosteus aculeatus* Linnaeus; Metzger and Schulte, 2018) and zebrafish  
129 (*Danio rerio* Hamilton; Scott and Johnston, 2012). We re-analyze the data from these  
130 studies with an overall goal of assessing whether changes in mRNA splicing play a key  
131 role in plastic responses as a result of thermal acclimation in ectotherms. To address this  
132 goal, we focus on the following questions: (1) What is the extent of alternative splicing in  
133 response to cold acclimation? (2) Are alternatively spliced (AS) genes also differentially  
134 expressed (DE) genes? (3) What are the potential cellular functions that are influenced by  
135 qualitative changes in gene expression? (4) Are there conserved patterns of alternative  
136 splicing across species?

137

## 138 **Materials and methods**

### 139 *Data acquisition*

140 Sequencing reads were obtained for three species of fish from previously  
141 published studies investigating quantitative changes in gene expression in response to  
142 acclimation to low temperatures: *F. heteroclitus* (Healy et al., 2017: National Center for  
143 Biotechnology Information [NCBI] Sequence Read Archive [SRA], SRP091735), *G.*  
144 *aculeatus* (Metzger and Schulte, 2018: NCBI SRA, SRP135801), and *D. rerio* (Scott and  
145 Johnston, 2012: European Bioinformatics Institute [EBI] Array Express Archive, E-  
146 MTAB-1155). From each of these studies, we utilized RNA-seq data from skeletal  
147 muscle collected from individuals acclimated to typical laboratory holding temperatures  
148 (*F. heteroclitus*: 15°C, n = 8; *G. aculeatus*: 18°C, n = 6; *D. rerio*: 27°C, n = 4), and  
149 individuals acclimated to relatively cold temperatures (*F. heteroclitus*: 5°C, n = 8; *G.*

150 *aculeatus*: 8°C, n = 6; *D. rerio*: 16°C, n = 4). Thus, the cold acclimation treatments in the  
151 current study represent approximately 10°C decreases in acclimation temperature  
152 compared to typical laboratory holding temperatures for all three species. *F. heteroclitus*  
153 were wild-caught and held under laboratory conditions (15°C) for at least a month prior  
154 to the start of experimental acclimations which were 4 weeks long. *G. aculeatus* and *D.*  
155 *rerio* were lab-raised at 18°C and 27°C, respectively, then experimental acclimations in  
156 adult individuals were 4 weeks and 30 days, respectively. Holding photoperiods and  
157 salinities varied across species (*F. heteroclitus*: 12L:12D, 20 ppt; *G. aculeatus*: 14L:10D,  
158 20 ppt; *D. rerio*: 12L:12D, 0 ppt), but were consistent between acclimation treatments  
159 within each species. Additional methodological details for fish handling, muscle  
160 sampling and RNA-seq can be found in Healy et al. (2017), Metzger and Schulte (2018)  
161 and Scott and Johnston (2012).

#### 162 *Gene-wise read mapping and analysis of differential expression*

163 To ensure differences in analytical pipelines among Healy et al. (2017), Metzger  
164 and Schulte (2018) and Scott and Johnston (2012) did not affect our comparisons of  
165 differential expression patterns among species, and differential expression and alternative  
166 splicing within species, we re-analyzed differential gene expression as a result of cold  
167 acclimation in each species using a common analytical approach. Sequencing reads were  
168 mapped to the appropriate reference genome for each species (*F. heteroclitus* reference  
169 genome 3.0.2 [NCBI]; *G. aculeatus* reference genome [ENSEMBL v88]; *D. rerio*  
170 reference genome [ENSEMBL v88]) with CLC Genomics Workbench v8.5 (CLC bio  
171 Qiagen®, Aarhus, Denmark). Unique exon counts were then exported and analyzed for  
172 differential expression using R v3.4.0 (R Core Team, 2017) with the *DESeq2* package  
173 v1.16.1 (Love et al., 2014). Differential expression was assessed with the approaches of  
174 Healy et al. (2017), which follow the recommendations of Lin et al. (2016). In brief, for  
175 each species, counts were normalized across libraries using the relative log expression  
176 method (Anders and Huber, 2010) with subsets of genes excluding likely DE genes that  
177 were detected in preliminary analyses, genes were filtered for low expression using  
178 counts per million cutoffs equivalent to 10 counts in the smallest library, and dispersions  
179 were calculated using the default methods of *DESeq2*. Healy et al. (2017) used the *edgeR*  
180 package (Robinson et al., 2010) rather than *DESeq2*; however, when parallel

181 methodological steps are utilized, these packages generally result in similar estimates of  
182 differential gene expression (Lin et al., 2016). In the current study, we chose *DESeq2*,  
183 because the *DEXSeq* package (Anders et al., 2012) that we used for the differential exon  
184 usage analysis (below) is an extension of *DESeq2*, and our desire was to minimize bias in  
185 our comparisons of mRNA expression and alternative splicing due to differences in  
186 bioinformatic techniques. Differential expression was tested by likelihood ratio tests ( $\alpha =$   
187 0.05), and false discovery rate was controlled using the Benjamini-Hochberg method  
188 (Benjamini and Hochberg, 1995).

### 189 *Exon-wise read mapping and analysis of differences in alternative splicing*

190 Differential exon usage was assessed using R and the package *DEXSeq* v1.22.0  
191 (Anders et al., 2012). Note that *DEXSeq* examines all changes in exon usage, which  
192 includes differences in both splicing patterns and usage of alternative transcription start  
193 sites. In this study, we refer to all significant effects detected with *DEXSeq* as “alternative  
194 splicing” to help clearly distinguish these results from those for differential gene  
195 expression; however, it is important to acknowledge that some of our results likely  
196 involve changes in transcriptional site usage rather than splicing of pre-mRNAs after  
197 transcription has been completed. Regardless, all of these effects result in the expression  
198 of alternative mRNAs from the same gene. The first step of the *DEXseq* analysis involves  
199 preparing a “flattened” general feature format (GFF) file for the genome of each species,  
200 which essentially compresses different transcripts produced from the same gene into a  
201 single gene model with non-overlapping exon segments. Reads are then mapped to exon  
202 segments, and differential exon usage is detected by differences in read ratios for  
203 individual exon segments compared to differences in read ratios across all exon segments  
204 for a gene. We performed GFF file flattening and read mapping using *python* as described  
205 in the *DEXSeq* manual (available at  
206 <http://bioconductor.org/packages/release/bioc/html/DEXSeq.html>). *DEXSeq* has been  
207 designed to perform flattening with GFF files in standard ENSEMBL format. Thus, for  
208 *G. aculeatus* and *D. rerio* we were able to use the GFF files available for these reference  
209 genomes from ENSEMBL. Because the *F. heteroclitus* genome is hosted by NCBI, the  
210 GFF file available for this genome does not follow ENSEMBL formatting. Consequently,  
211 we converted the *F. heteroclitus* GFF file to the correct format to allow flattening with



212 *DEXSeq*. We have made our converted GFF file for *F. heteroclitus* available online (*the*  
213 *file will be submitted as part of an EBI BioStudy should the manuscript be accepted*), but  
214 other than formatting it is essentially equivalent to the publically available GFF file from  
215 NCBI.

216 Exon read counts were analyzed for differential exon usage following the  
217 guidelines in the *DEXSeq* manual. Read counts were normalized, dispersions were  
218 calculated, and then differential exon usage was tested ( $\alpha = 0.05$ ) using the default  
219 methods for *DEXSeq*. As for our analyses of differential gene expression, corrections for  
220 multiple comparisons in our differential exon usage analysis were made using the  
221 Benjamini-Hochberg method (Benjamini and Hochberg, 1995).

#### 222 *Analysis of functional enrichment*

223 Functional enrichment analyses for the sets of genes demonstrating differential  
224 gene expression or alternative splicing were conducted with the R package *goseq* v1.28.0  
225 (Young et al., 2010), and species-specific databases of Gene Ontology (GO) terms. GO  
226 annotations for the genes in the *D. rerio* reference genome were obtained from  
227 ENSEMBL BioMart. *F. heteroclitus* GO terms were determined from UniProt accession  
228 numbers for zebrafish, mouse (*Mus musculus*), and human (*Homo sapiens*) orthologs of  
229 killifish genes (Reid et al., 2016), as in Healy et al. (2017). *G. aculeatus* gene GO  
230 annotations were accessed from the GO database in Metzger and Schulte (2016). All GO  
231 databases have been provided online (*the files will be submitted as part of an EBI*  
232 *BioStudy should the manuscript be accepted*). We assessed significant enrichment of GO  
233 functional terms for (1) DE and AS genes in each species separately, and (2) common DE  
234 or AS genes across the three species. In all cases  $\alpha$  was set at 0.05, and  $p$ -values were  
235 corrected to account for false discovery rate using the Benjamini-Hochberg method  
236 (Benjamini and Hochberg, 1995).

#### 237 *Identification of putative orthologs*

238 Comparison of DE and AS genes within each species was straightforward, as  
239 genes could be matched based on their gene identifiers. However, to compare DE or AS  
240 genes across species, and thus to identify genes that were commonly differentially  
241 expressed or alternatively spliced as a result of cold acclimation, it was necessary to  
242 identify putative orthologous genes across the species.

243 A reciprocal basic local alignment search tool (BLAST) strategy was used to  
244 identify putative orthologs (Moreno-Hagelsieb and Latimer, 2007). We downloaded the  
245 NCBI command-line based BLAST program, and created a local BLAST database for all  
246 the mRNA transcripts associated with the reference genomes for each species in our  
247 study (3 databases total). For the DE genes in each species, we queried the mRNA  
248 databases for the other two species. We kept the top 10 BLAST hits for each gene, and  
249 then filtered hits for e-value  $< 0.000001$  and query coverage  $\geq 33.3\%$ . For some genes,  
250 several of the top BLAST results with e-value  $< 0.000001$  mapped to different regions of  
251 the same target transcript. In these cases, the non-overlapping query coverage was  
252 summed across results prior to application of the coverage filter. This procedure was  
253 repeated for the lists of genes demonstrating alternatively splicing, and resulted in high-  
254 quality BLAST results for between 72.1% and 96.0% of the genes for each pair of species  
255 across the DE or AS genes. Putative orthologs were then determined by limiting BLAST  
256 results to pairs of genes between species that were identified as top BLAST hits in each  
257 reciprocal BLAST pair (i.e., query sequence for species A returns target gene in species  
258 B, query sequence for species B returns target gene species A, query sequence for species  
259 A equals target gene in species A, and query sequence for species B equals target gene in  
260 species B). Note that this analysis does not preclude a gene in one species pairing with  
261 more than one gene in another species. We maintained this possibility in our analysis  
262 because differences in genome quality, annotation methods, gene duplication and  
263 retention of duplicated genes could result in one gene legitimately being the best high-  
264 quality match for more than one gene in another species (and vice versa). In these cases,  
265 it can be difficult to determine conclusively which cross-species pair of genes represents  
266 the true ortholog. Therefore, we decided to keep all potential orthologous pairs identified  
267 by our reciprocal BLAST strategy without requiring 1 to 1 hits; however, we accounted  
268 for the possibility of 1 to  $>1$  hits when determining the number of commonly DE or AS  
269 genes across species (i.e., a 1 to 2 reciprocal BLAST result was counted as evidence of a  
270 single overlapping pair of orthologs, whereas a 2 to 2 result was counted as two  
271 overlapping pairs of orthologs, etc.). Orthologous genes identified by these analyses are  
272 available in Table S1.

273 Splicing patterns of the common AS genes were investigated by plotting the  
274 relative exon expression for each gene in each species with a modified version of the  
275 plotDEXSeq() function from the *DEXSeq* package.

276

## 277 **Results**

### 278 *Patterns of differential expression and alternative splicing within species*

279 Overall patterns of differential gene expression in response to cold acclimation in  
280 each species were similar to those published previously (Scott and Johnston, 2012; Healy  
281 et al., 2017; Metzger and Schulte, 2018), and consequently only a brief description of  
282 these results is presented here. In total, 6,719 genes in *F. heteroclitus*, 8,310 genes in *G.*  
283 *aculeatus* and 4,555 genes in *D. rerio* (Table S2) were differentially expressed as a result  
284 of cold acclimation. Thus, in all three species acclimation to low temperatures involved  
285 changes in expression of a large proportion of the transcriptome (17.9-42.6%).

286 Additionally, substantially more genes increased in expression than decreased in  
287 expression in all three species: 68.8%, 65.8% and 61.7% of the total DE genes in killifish,  
288 stickleback and zebrafish, respectively (Fig. S1). This pattern had been observed  
289 previously for killifish and stickleback (Healy et al., 2017; Metzger and Schulte, 2018),  
290 but not for zebrafish (Scott and Johnston, 2012), and the difference between these results  
291 for zebrafish is likely due to the use of a modified RNA-seq normalization in the current  
292 study. Consistent with this possibility, a bias towards up-regulated gene expression in  
293 response to cold acclimation was typical in transcriptomic studies prior to the use of  
294 RNA-seq (e.g., Gracey et al., 2004).

295 In comparison to the substantial proportions of the transcriptome that changed  
296 expression quantitatively as a result of cold acclimation, cold-acclimation-mediated  
297 qualitative changes in gene expression through alternative splicing were relatively  
298 modest. However, acclimation to low temperature still resulted in significant differences  
299 in splicing in a large number of genes in each species: 561 in killifish, 426 in stickleback  
300 and 866 in zebrafish (Table S2). This likely indicates that the expression of alternatively  
301 spliced transcripts is a key component of the responses to chronic exposure to cold  
302 temperature in these species. In addition, 51.7%, 66.7% and 41.0% of the AS genes in  
303 killifish, stickleback and zebrafish, respectively, were also differentially expressed as a

304 result of cold acclimation (Fig. 1), suggesting that relatively high proportions of  
305 alternatively spliced genes are also differentially expressed.

### 306 *Functional enrichment within differential expression or alternatively spliced genes*

307 To summarize potential cellular functions involved in responses to chronic low  
308 temperatures we performed GO enrichment analyses for the DE or AS genes in each  
309 species. Given the similarities between the DE genes detected in the current study and  
310 those observed in previous studies, we expected that GO enrichment analyses would also  
311 reveal similar functional enrichments to those published previously (Scott and Johnston,  
312 2012; Healy et al., 2017; Metzger and Schulte, 2018), which they did. As a result, these  
313 results are not described in detail here. However, 76, 113 and 29 GO terms were detected  
314 as significantly enriched for differential expression in *F. heteroclitus*, *G. aculeatus* and *D.*  
315 *rerio*, respectively, and lists of these GO terms can be found in Table S3. Importantly in  
316 the context of the current study, biological process GO terms for gene expression  
317 (GO:0010467), mRNA splicing via spliceosome (GO:0000398) and RNA splicing  
318 (GO:0008380), and cellular component terms for catalytic step 2 spliceosome  
319 (GO:0071013) and spliceosomal complex (GO:0005681) are among the enriched GO  
320 terms with the lowest *p*-values for enrichment in killifish and stickleback ( $p \leq 9.44 \times 10^{-9}$   
321 for all). Interestingly, these terms are absent from the enriched GO terms in zebrafish,  
322 despite the fact that the highest number of AS genes in response to cold acclimation was  
323 found in zebrafish (866 versus 561 and 426).

324 Not surprisingly given the lower numbers of alternatively spliced genes compared  
325 to differentially expressed genes (Fig. 1), fewer GO terms were significantly enriched for  
326 AS genes regardless of species. There were 27 enrichments in killifish, 15 in sticklebacks  
327 and 24 in zebrafish (Table S3). As GO biological processes (rather than cellular  
328 components or molecular functions) often provide the most insight into the specific  
329 cellular functions demonstrating enrichment, Fig. 2 highlights the significantly enriched  
330 biological process terms for all three species. In total across the three species, 25 GO  
331 biological processes demonstrated enrichment for alternative splicing. Again, in the  
332 context of the current study, one particularly interesting result is that RNA splicing  
333 (GO:0008380) was significantly enriched for AS genes in response to chronic low  
334 temperature in *F. heteroclitus*. Yet, strikingly, no GO biological process was enriched in

335 all three species, and moreover most terms were enriched in only one of the species.  
336 These observations suggest that although many qualitative changes in gene expression as  
337 a result of cold acclimation are observed in each species, there is substantial divergence  
338 in the cellular processes with excess numbers of alternatively spliced genes. However,  
339 there was a clear pattern for functional enrichments of different GO biological processes  
340 associated with muscle contraction or regulation of muscle contraction in all three species  
341 (e.g., muscle contraction [GO:0006936] in killifish and stickleback, and striated muscle  
342 contraction in zebrafish [GO:0006941]), and GO cellular component and molecular  
343 function enrichments that are common in all species (e.g., muscle myosin complex  
344 [GO:0030018] and structural constituent of muscle [GO:0008307]) also suggest that  
345 alternative splicing of genes involved in contraction is likely common across the species.  
346 Thus, there may be more conservation of cellular functions associated with cold-  
347 acclimation-mediated alternative splicing than is evident based on comparison of specific  
348 GO terms alone.

#### 349 *Comparison of differential expression and alternative splicing across species*

350 To compare patterns of differential gene expression and alternative splicing across  
351 killifish, stickleback and zebrafish, we identified putative orthologs across the species for  
352 each significant DE or AS gene (see *Materials and Methods*). The overlap in DE or AS  
353 genes among species is displayed in Fig. 3. 1,045 common DE genes and 29 common AS  
354 genes were detected among the three species (Fig. 3A,B, respectively). Thus, 12.6-22.9%  
355 of all DE genes in a species were part of a suite of genes that were differentially  
356 expressed in response to cold acclimation regardless of species, whereas 3.3-6.8% of all  
357 AS genes were found commonly in all species (percentage ranges are due to differences  
358 in total number of DE or AS genes among species). These results reveal a clear pattern  
359 that there is substantial divergence among species in both quantitative and qualitative  
360 changes in gene expression as a result of cold acclimation. However, the genes that  
361 consistently demonstrate differential expression or alternative splicing across species are  
362 potentially an important subset of genes that may represent a conserved core response to  
363 chronic cold temperatures.

364 The common genes that were differentially expressed as a result of cold  
365 acclimation are listed in potential ortholog groups in Table S4. To examine the potential

366 functions that are affected by changes in expression of the common DE genes, we  
367 performed GO enrichment analyses for these DE genes in each species. We reduced the  
368 influence of differences in GO annotation across the genomes by keeping only the  
369 significantly enriched GO terms found in all three species, resulting in 21 significantly  
370 enriched GO terms (Table 1). Taken together these GO terms clearly indicate that  
371 common DE genes are primarily enriched for involvement in proteasome function (e.g.,  
372 positive regulation of proteasomal protein catabolic process [GO:1901800]), although  
373 there is some indication for enrichment of genes involved in spliceosome function as well  
374 (e.g., catalytic step 2 spliceosome [GO:0071013]).

375 We assessed potential functional enrichments for the common AS genes using the  
376 same approach as the one described above for the common DE genes. Three significant  
377 GO enrichments were identified for the AS genes observed in all species, which all  
378 indicated enriched alternative splicing for genes involved in the structure or function of  
379 the contractile apparatus (Table 1). However, with the relatively small number of  
380 common AS genes, examining specific genes rather than summary enrichment analyses  
381 alone may be more appropriate for these genes. The 29 common AS genes across species  
382 are listed in putative orthologous groups in Table 2 (note the number of overlapping  
383 genes are calculated as described in the *Materials and Methods*). As expected from the  
384 GO enrichment results for these genes, several genes are involved in muscle contraction  
385 or the structure of the contractile apparatus (*atp2a1l*, *myom1b*, *smyhc1*, *ryr1*, *mybph*,  
386 *cacnals*, *smyd1b*, *myh13* and *tnnt2e*). However, genes involved in other cellular functions  
387 also demonstrated alternative splicing in all three species. For example, there were cold-  
388 acclimation-mediated changes in splicing of genes involved in metabolic processes such  
389 as glycogen breakdown (*phkg1* and *phkb*) and glycolysis (*aldoa* and *pfkfb4*).  
390 Additionally, cold shock domain-containing protein E1 (*csdel*), which is an RNA binding  
391 protein involved in RNA stability and regulation of translation (Mihailovich et al., 2010),  
392 is alternatively spliced in all three species. This gene is named for cold shock domains in  
393 the protein which were originally identified in bacterial cold shock proteins that increase  
394 in expression at low temperature to improve cellular function and growth in the cold  
395 (Horn et al., 2007; Mihailovich et al., 2010).

396           Although there were 29 common AS genes in killifish, stickleback and zebrafish,  
397 sharing statistical significance for alternative splicing does not necessarily mean that  
398 these genes demonstrate the same splicing patterns in all three species. Indeed, splicing  
399 patterns for the common AS genes were generally variable among the species with little  
400 evidence for consistent changes in exon usage (*supporting figures will be available as*  
401 *part of an EBI BioStudy should the manuscript be accepted*). However, in many cases  
402 there were similarities between at least a pair of the species (e.g., *atp2a11*, *eif4a2*, *fln* and  
403 *fry*). Furthermore, two genes had remarkably similar changes in alternative splicing in all  
404 three species. For *aldoa* (annotated as *aldoc* in *F. heteroclitus*), an exon near the start of  
405 the gene was expressed at higher levels in all of the cold-acclimated fish ( $q \leq 0.03$ ; Fig.  
406 4A,B,C, note that the orientation of *aldoa* in the *G. aculeatus* genome is in the opposite  
407 direction to the orientation in the other two genomes). For *csdel*, an exon or exons in the  
408 front half of the gene also had higher usage in fish acclimated to cold temperatures  
409 regardless of species ( $q \leq 0.01$ ; Fig. 4D,E,F). Thus, despite most of the common AS  
410 genes sharing only the general characteristic of expression of different splice variants as a  
411 result of cold acclimation, two potentially key genes demonstrated conservation of even  
412 the specific changes in exon expression across species.

413

#### 414 **Discussion**

415           This study clearly demonstrates that qualitative changes in gene expression as a  
416 result of changes in mRNA splicing patterns likely play an important mechanistic role in  
417 phenotypic plasticity in ectothermic vertebrates. There were substantial changes in  
418 splicing patterns in cold-acclimated fish in all three of the species examined in the current  
419 study, although fewer genes demonstrated qualitative than quantitative changes in  
420 expression. Large proportions of the AS genes were also differentially expressed, and  
421 many AS genes were involved in cellular processes that have previously been identified  
422 as important components of plastic responses to chronic cold. Furthermore, despite an  
423 overall pattern of divergence in cold-acclimation-mediated splicing patterns across  
424 species, there was a small set of common AS genes in killifish, stickleback and zebrafish,  
425 suggesting that a subset of qualitative changes in gene expression may play a conserved  
426 role in regulating plasticity as a result of cold acclimation in ectotherms.

427 *Role of changes in mRNA splicing patterns in plasticity as a result of cold acclimation*  
428       Large-scale quantitative rearrangement of the transcriptome is commonly  
429 observed in response to prolonged exposure to cold temperatures in ectotherms (e.g.,  
430 Gracey et al., 2004), and the results presented here are consistent with this expectation as  
431 between ~20% and ~40% of the expressed genes in skeletal muscle demonstrated cold-  
432 acclimation-mediated differential expression, depending on the species examined (6,719  
433 of 22,120 in *F. heteroclitus*; 8,310 of 19,520 in *G. aculeatus*; 4,555 of 25,477 in *D.*  
434 *rerio*). Generally, these transcriptional rearrangements suggest several hallmark cellular  
435 responses to the effects of low temperature: (1) bias towards up-regulation of gene  
436 expression, (2) cellular stress responses including up-regulation of genes involved in  
437 protein folding, protein ubiquitination, proteasome and DNA repair functions, (3) up-  
438 regulation of genes involved in mRNA expression, RNA processing, and pre-mRNA  
439 splicing, and (4) enriched differential expression of genes involved in metabolic  
440 pathways (Itoi et al., 2003; Gracey et al., 2004; Vornanen et al., 2005; Chou et al., 2008;  
441 Castilho et al., 2009; Vergauwen et al., 2010; Long et al., 2012, 2013; Scott and Johnston,  
442 2012; Jayasundara et al., 2013, 2015; Rebl et al., 2013; Bilyk and Cheng, 2014; Mininni  
443 et al., 2014; Morris et al., 2014; Wang et al., 2014; Hu et al., 2015; Liang et al., 2015;  
444 Verleih et al., 2015; Healy et al., 2017; Ikeda et al., 2017; Metzger and Schulte, 2018).  
445 However, the direction of differential expression of metabolic genes is species-specific  
446 and likely indicates differences in metabolic strategy (i.e., thermal compensation, no  
447 compensation, or inverse compensation) as a result of chronic cold (Precht, 1958;  
448 Guderley, 2004; Healy et al., 2017). As expected, the results of our re-analyses to  
449 compare cold-acclimation-mediated differential expression across species were consistent  
450 with these established patterns. Together, these patterns suggest that the major cellular  
451 responses as a result of cold acclimation are thermal compensation of gene expression,  
452 up-regulation of protective mechanisms to compensate for the effects of cold on protein  
453 and RNA structure and folding, modification of metabolic energy supply and demand,  
454 and potentially changes in mRNA splicing patterns.

455       In comparison to the extent of quantitative changes in gene expression as a result  
456 of cold acclimation, qualitative changes to the mRNA pool in response to chronic cold  
457 were relatively modest. However, several hundred genes demonstrated cold-acclimation-



458 mediated alternative splicing in each species representing as sizeable transcriptional  
459 response. For comparison, quantitative changes in mRNA expression as a result of acute  
460 changes in temperature often involve similar numbers of genes as the numbers of AS  
461 genes in the current study (e.g., Gasch et al., 2000; Buckley et al., 2006; Schoville et al.,  
462 2012; Gleason and Burton, 2015). This suggests that changes in mRNA splicing are key  
463 aspects of transcriptional responses to cold acclimation, and that qualitative changes in  
464 gene expression are important mechanisms underlying phenotypic plasticity in  
465 ectothermic animals.

466         The possibility that changes in splicing patterns play a key role in cold  
467 acclimation is further supported by functional enrichments associated with alternative  
468 splicing in killifish, stickleback and zebrafish. Although there was little evidence for  
469 common enriched GO terms across the species, which may, in part, be a consequence of  
470 differences in the quality or extent of the annotation databases for the different genomes,  
471 when the species were considered separately there were functional enrichments that were  
472 consistent with several of the major cellular responses to cold acclimation described  
473 above. For example, there was enriched alternative splicing for genes involved in RNA  
474 splicing (GO:0008380), poly(A) RNA binding (GO:0044822), and the tricarboxylic acid  
475 cycle (GO:0006099), suggesting AS genes associated with changes in splice patterns,  
476 RNA chaperoning and metabolic pathways in killifish, stickleback and zebrafish,  
477 respectively. Similar temperature-mediated changes in exon usage associated with RNA  
478 splicing and binding is also common in plants (Capovilla et al., 2015; Filichkin et al.,  
479 2015; Calixto et al., 2018). Even at the level of specific genes, variation in splicing  
480 patterns was observed for genes, such as cold-inducible RNA binding protein (*cirbp*) in  
481 killifish and zebrafish, which have previously been highlighted for their responses and  
482 roles in cold acclimation (Gracey et al., 2004; Sano et al., 2015). We also observed  
483 substantial evidence for enrichment of AS genes associated with contractile structures  
484 and functions, which is clearly consistent with changes in splicing associated with a  
485 central function of muscle tissue that is known to demonstrate plasticity in response to  
486 temperature change (Johnston et al., 1990; Johnston and Temple, 2002). Therefore, many  
487 of the major cellular processes showing plasticity through changes in gene expression as

488 a result of cold acclimation demonstrate not only quantitative but also qualitative  
489 responses.

490         Given the similarities between the cellular processes associated with differential  
491 expression and alternative splicing as a result of cold acclimation, it is perhaps not  
492 surprising that large proportions of AS genes are also DE genes across the species in the  
493 current study (61.7-68.8%). It is possible that this overlap between AS and DE genes is  
494 simply a function of the large-scale quantitative transcriptomic changes that are  
495 associated with cold acclimation. However, in all three species the percentage of AS  
496 genes that are differentially expressed is at least 23.2% higher than the percentage of all  
497 expressed genes that are differentially expressed. Thus, it is also possible that our results  
498 indicate a bias for differential expression of genes that are also alternatively spliced.  
499 Regardless, our data clearly demonstrate that quantitative and qualitative changes in  
500 expression are not exclusive at the gene-level, and may highlight genes that play  
501 important roles in regulating cold-acclimation-mediated plasticity as there are both  
502 changes in transcript amounts and types for these genes. The number of genes  
503 demonstrating both quantitative and qualitative responses may also suggest that the  
504 functional consequences of the two processes are at least somewhat independent or  
505 complementary (i.e., quantitative transcript responses cannot be achieved qualitatively,  
506 and vice versa), which would emphasize the importance of understanding the  
507 contributions of both types of transcriptomic change in regulating cellular plasticity. With  
508 regards to this consideration, an important caveat is the fact that mRNA levels do not  
509 always directly reflect protein levels (e.g., Gygi et al., 1999), and the extent to which  
510 alternative mRNA transcripts lead to alternative proteins remains unresolved (Tress *et al.*,  
511 2017; Blencowe, 2017). Therefore, confirmation that the qualitative changes observed  
512 here result in the expression of alternative protein forms with functional differences is an  
513 important next step.

514         One particularly interesting process demonstrating both quantitative and  
515 qualitative changes in mRNA expression in the cold is RNA splicing itself. For instance,  
516 GO terms associated with RNA processing have enrichment for differential gene  
517 expression as a result of cold acclimation in killifish, stickleback and zebrafish, and at  
518 least in killifish similar GO terms are also enriched for alternative splicing. Overall

519 thermal compensation of gene expression likely contributes to some of these quantitative  
520 changes in the expression of splicing genes. However, qualitative changes in the  
521 expression of these genes are consistent with differences in splicing patterns rather than  
522 simply the amount of splicing machinery present in the cell. In plants, several genes  
523 involved in regulation of splicing express alternatively spliced mRNAs in response to  
524 changes in temperature (Lazar and Goodman, 2000; Iida et al., 2004; Palusa et al., 2007),  
525 and these effects play a primary role in cellular thermosensory functions (Capovilla et al.,  
526 2015). Similar thermosensory functions are associated with temperature-mediated  
527 splicing events in yeast (Meyer et al. 2011). Additional work is necessary to conclude  
528 that changes in pre-mRNA splicing serve as a cellular thermometer in ectothermic  
529 animals as well; however, several splicing factors demonstrate alternative splicing in our  
530 study (e.g., *sf3b1*, *srsf3* and *sfpq*). Thus, there is potentially an under-appreciated and  
531 important role for alternative splicing in thermosensory functions in animals, and this  
532 possibility merits further research attention in the future (Somero, 2018).

### 533 *Conservation of quantitative and qualitative differential gene expression across species*

534       Considering the overall similarities in cellular processes demonstrating  
535 differential gene expression and alternative splicing as a result of cold acclimation across  
536 studies and species, it is remarkable the extent of divergence in specific differential  
537 expression or alternative splicing patterns among even the three species of fish examined  
538 in the current study. Moreover, this is the case if either specific genes (DE or AS), or  
539 enriched cellular functions associated with these genes are compared. Several  
540 possibilities could contribute to these differences in gene expression responses across  
541 species. (1) Our reciprocal BLAST strategy for ortholog identification may have been  
542 conservative, which would reduce the potential for overlapping DE or AS genes across  
543 the species. (2) Metabolic strategies in response to prolonged cold temperatures often  
544 differ among species, and previous studies have suggested that killifish do not  
545 compensate metabolic functions in skeletal muscle (Healy et al., 2017), whereas  
546 stickleback and zebrafish display thermal compensation (Metzger and Schulte, 2018;  
547 Scott and Johnston, 2012), which is consistent with divergence of gene expression  
548 patterns. (3) Although similar relative cold exposures were compared in our study, the  
549 specific temperature ranges for each species may change the effects of cold temperature

550 on cellular function. For example, state-transitional effects of biological membranes  
551 occur below 10°C in *F. heteroclitus* which results in dramatic differences in the effects of  
552 cold shock at temperatures above or below this threshold (Buhariwalla et al., 2012;  
553 Malone et al., 2015). Thus, 15-18°C to 5°C in killifish and stickleback may represent a  
554 substantially different physiological challenge than 27°C to 16°C in zebrafish. However,  
555 this would suggest that comparisons of the DE or AS genes in killifish and stickleback  
556 should be more similar than the same comparisons for either species with zebrafish, and  
557 our data are not consistent with this pattern. (4) Lastly, variation in GO annotations (e.g.,  
558 level of annotation) of the killifish, stickleback and zebrafish genomes almost certainly  
559 reduces the overlap in enriched annotations associated with the DE or AS genes in each  
560 species, and as discussed above functional overlap is likely higher than comparisons of  
561 specific annotations alone. Although these possibilities may partially explain the  
562 observed divergence of differential expression and alternative splicing among species in  
563 the current study, it is unlikely that they do so completely. Thus, our data suggest that the  
564 bulk of either quantitative or qualitative changes in gene expression in response to cold  
565 acclimation are not conserved across species.

566 Despite this overall pattern of divergence in gene expression, there were subsets  
567 of both DE and AS genes there demonstrated conservation of quantitative or qualitative  
568 changes across killifish, stickleback and zebrafish. These genes may be central in cellular  
569 responses to prolonged exposure to cold temperature that occur regardless of species.  
570 Consistent with greater numbers of genes demonstrating quantitative changes in gene  
571 expression than qualitative changes, higher numbers of DE genes than AS genes  
572 demonstrated conserved patterns. Indeed, this exceeded the extent which would be  
573 expected from the numbers of DE or AS genes alone, as 12.6-22.9% of all DE genes were  
574 commonly identified in all three species, whereas this was the case for only 3.3-6.8% of  
575 AS genes. Therefore, our data indicate that there may be more conservation of  
576 quantitative than qualitative changes in gene expression as a result of cold acclimation.  
577 This raises the intriguing possibility that this may be a common aspect of plastic changes  
578 in gene expression in response to other environmental factors as well, and could suggest  
579 that qualitative changes in gene expression are a critical in species-specific responses.

580 Genes that were commonly differentially expressed in response to chronic cold  
581 temperature in killifish, stickleback and zebrafish were enriched for those involved in  
582 many of the major cellular functions known to respond to cold acclimation described  
583 above (e.g., RNA splicing, proteasome function and metabolic pathways). This suggests  
584 that at least some aspects of quantitative changes associated with these central cellular  
585 responses are conserved across species. In contrast, only functional annotations related to  
586 muscle contraction (striated muscle contraction [GO:0006941], muscle myosin complex  
587 [GO:0005859] and Z disc [GO:0030018]) were enriched among the AS genes that were  
588 commonly identified in the three species. These results may be consistent with  
589 differences in the functional consequences of quantitative and qualitative changes in gene  
590 expression as suggested above. Given the high structural dependence of muscle  
591 contractile functions, structural changes in proteins as a result of changes in splicing  
592 patterns may be necessary to adequately adjust contractile function either to reduce  
593 energetic demands or to compensate for the slowing thermodynamic effects of low  
594 temperatures. This possibility would be consistent with previous work demonstrating  
595 temperature-mediated changes in myosin isoform expression in common carp that  
596 improve muscle performance at either warm or cold temperatures (Goldspink, 1995).  
597 Despite functional enrichment of common AS genes indicating that these genes are not  
598 involved in the central responses previously associated with cold-acclimated-mediated  
599 changes in gene expression, several common AS genes are known to function in  
600 metabolic pathways (e.g., *aldoa*, *pfkfb4*, *phkb* and *phkg1*), or RNA binding and  
601 chaperoning (e.g., *csde1*). Thus, it is likely that there are conserved changes in pre-  
602 mRNA splicing that also contribute to plasticity of cellular processes known to play  
603 important roles in cold acclimation. Furthermore, although most of the common AS  
604 genes demonstrated variation in patterns of alternative splicing across species, two of  
605 these genes (*aldoa* and *csde1*) even had similar changes in exon usage in cold-acclimated  
606 fish regardless of species, suggesting that not only are AS genes involved in metabolic  
607 pathways and RNA chaperoning, but also that these are key responses with conservation  
608 of splicing patterns across species.

609

610 **Conclusion**

611 Our results reveal that there are substantial changes in mRNA splicing patterns in  
612 response to chronic cold temperatures in ectothermic vertebrates. The extent of these  
613 qualitative changes in gene expression is smaller than the extent of quantitative changes  
614 in transcript levels overall; however, differences in splicing patterns are observed for  
615 genes involved in many of the cellular processes that are thought to be key in cold-  
616 acclimation responses. Thus, it is likely that these changes in splicing play an important  
617 mechanistic role underlying phenotypic plasticity in response to temperature at the  
618 cellular level. In addition, genes demonstrating qualitative changes in expression often  
619 also demonstrate quantitative changes in expression, and there are both conserved AS  
620 genes and conserved patterns of exon usage among the three species in our study. These  
621 observations suggest that there may be changes in splicing patterns for a set of genes that  
622 play central roles in cold-acclimation responses across ectotherms. Taken together, our  
623 findings emphasize that qualitative changes in gene expression, in addition to quantitative  
624 changes, are important physiological mechanisms contributing to phenotypic plasticity as  
625 a result of environmental change.

626

#### 627 **Competing interests**

628 No competing interests declared

629

#### 630 **Funding**

631 This work was supported by the Natural Sciences and Engineering Research Council of  
632 Canada (NSERC) [Discovery Grant to P.M.S.].

633

#### 634 **Data availability**

635 RNA-seq reads utilized in the current study are available at the NCBI SRA (SRP091735  
636 and SRP135801 for killifish and stickleback, respectively), and the EBI Array Express  
637 Archive (E-MTAB-1155 for zebrafish). The gene-wise and exon-wise read count files,  
638 GO annotation databases, and flattened GFF files for each species will be uploaded to an  
639 EBI BioStudy record associated with our study should the manuscript be accepted. Our  
640 reformatted GFF file that allowed the creation of the flattened GFF file for *F. heteroclitus*

641 will also be provided with the BioStudy. All other data and results associated with the  
642 manuscript are provided as supplemental materials.

643

## 644 **References**

645 **Anders, S. and Huber, W.** (2010). Differential expression analysis for sequence count  
646 data. *Genome Biol.* **11**, R106.

647

648 **Anders, S., Reyes, A. and Huber, W.** (2012). Detecting differential usage of exons from  
649 RNA-seq data. *Genome Res.* **22**, 4025.

650

651 **Benjamini, Y. and Hochberg, Y.** (1995). Controlling the false discovery rate: a practical  
652 and powerful approach to multiple testing. *J. R. Stat. Soc. Series B.* **57**, 289-300.

653

654 **Bilyk, K. T. and Cheng, C-H. C.** (2014). RNA-seq analyses of cellular responses to  
655 elevated body temperature in the high Antarctic cryopelagic nototheniid fish *Pagothenia*  
656 *borchgrevinki*. *Mar. Genomics.* **18**, 163-171.

657

658 **Blencowe, B. J.** (2017). The relationship between alternative splicing and proteomic  
659 complexity. *Trends Biochem. Sci.* **42**, 407-408.

660

661 **Buckley, B. A., Gracey, A. Y. and Somero, G. N.** (2006). The cellular response to heat  
662 stress in the goby *Gillichthys mirabilis*: a cDNA microarray and protein-level analysis. *J.*  
663 *Exp. Biol.* **209**, 2660-2677.

664

665 **Buhariwalla, H. E. C., Osmond, E. M., Barnes, K. R., Cozzi, R. R. F., Robertson, G.**  
666 **N. and Marshall, W. S.** (2012). Control of ion transport by mitochondrion-rich chloride  
667 cells of eurythermic teleost fish: cold shock vs. cold acclimation. *Comp. Biochem.*  
668 *Physiol. A.* **162**, 234-244.

669

670 **Calixto, C. P., Guo, W., James, A. B., Tzioutziou, N. A., Entizne, J. C., Panter, P. E.,**  
671 **Knight, H., Nimmo, H., Zhang, R. and Brown, J. W.** (2018). Rapid and dynamic  
672 alternative splicing impacts the Arabidopsis cold response transcriptome. *Plant Cell.* tpc-  
673 00177.

674

675 **Capovilla, G., Pajoro, A., Immink, R. G. and Schmid, M.** (2015). Role of alternative  
676 pre-mRNA splicing in temperature signaling. *Curr. Opin. Plant Biol.* **27**, 97-103.

677

678 **Castilho, P. C., Buckley, B. A., Somero, G. and Block, B. A.** (2009). Heterologous  
679 hybridization to a complementary DNA microarray reveals the effect of thermal  
680 acclimation in the endothermic bluefin tuna (*Thunnus orientalis*). *Mol. Ecol.* **18**, 2092-  
681 2102.

682

683 **Chou, M-Y., Hsiao, C-D., Chen, S-C., Chen, I-W., Liu, S-T. and Hwang, P-P.** (2008).  
684 Effects of hypothermia on gene expression in zebrafish gills: upregulation in

- 685 differentiation and function of ionocytes as compensatory responses. *J. Exp. Biol.* **211**,  
686 3077-3084.
- 687
- 688 **Filichkin, S., Priest, H. D., Megraw, M. and Mockler, T. C.** (2015). Alternative  
689 splicing in plants: directing traffic at the crossroads of adaptation and environmental  
690 stress. *Curr. Opin. Plant Biol.* **24**, 125-135.
- 691
- 692 **Garcia, T. I., Shen, Y., Crawford, D., Oleksiak, M. F., Whitehead, A. and Walter, R.**  
693 **B.** (2012). RNA-Seq reveals complex genetic response to deepwater horizon oil release in  
694 *Fundulus grandis*. *BMC Genomics*, **13**, 474.
- 695
- 696 **Garrett, S. C. and Rosenthal, J. J. C.** (2012). RNA editing underlies temperature  
697 adaptation in K<sup>+</sup> channels from polar octopuses. *Science*. **335**: 848-851.
- 698
- 699 **Gasch, A. P., Spellman, P. T., Kao, C. M., Carmel-Harel, O., Eisen, M. B., Storz, G.,**  
700 **Botstein, D. and Brown, P. O.** (2000). Genomic expression programs in the response of  
701 yeast cells to environmental changes. *Mol. Biol. Cell.* **11**, 4241-4257.
- 702
- 703 **Gerber, A. P. and Keller, W.** (2001). RNA editing by base deamination: more enzymes,  
704 more targets, new mysteries. *Trends Biochem. Sci.* **26**, 376-384.
- 705
- 706 **Gleason, L. U. and Burton, R. S.** (2015). RNA-seq reveals regional differences in  
707 transcriptome response to heat stress in the marine snail *Chlorostoma funebris*. *Mol.*  
708 *Ecol.* **24**, 610-627.
- 709
- 710 **Goldspink, G.** (1995). Adaptation of fish to different environmental temperature by  
711 qualitative and quantitative changes in gene expression. *J. Therm. Biol.* **20**, 167-174.
- 712
- 713 **Gracey, A. Y., Fraser, E. J., Weizhong, L., Fang, Y., Taylor, R. R., Rogers, J., Brass,**  
714 **A. and Cossins, A. R.** (2004). Coping with cold: an integrative, multitissue analysis of  
715 the transcriptome of a poikilothermic vertebrate. *Proc. Natl. Acad. Sci. USA.* **101**, 16970-  
716 16975.
- 717
- 718 **Guderley, H.** (2004). Metabolic responses to low temperature in fish muscle. *Biol. Rev.*  
719 **79**, 409-427.
- 720
- 721 **Gygi, S. P., Rochon, Y., Franza, B. R. and Aebersold, R.** (1999). Correlation between  
722 protein and mRNA abundance in yeast. *Mol. Cell Biol.* **19**, 1720-1730.
- 723
- 724 **Healy, T. M., Bryant, H. J. and Schulte, P. M.** (2017). Mitochondrial genotype and  
725 phenotypic plasticity of gene expression in response to cold acclimation in killifish. *Mol.*  
726 *Ecol.* **26**, 814-830.
- 727
- 728 **Hopkins, D., Envall, T., Poikela, N., Pentikäinen, O. T., and Kankare, M.** (2018).  
729 Effects of cold acclimation and dsRNA injections on Gs11 gene splicing in *Drosophila*  
730 *montana*. *Sci. Rep.* **8**, 7577.



- 731  
732 **Horn, G., Hofweber, R., Kremer, W. and Kalbitzer, H. R.** (2007). Structure and  
733 function of bacterial cold shock proteins. *Cell. Mol. Life Sci.* **64**, 1457.  
734  
735 **Hu, Y-C., Kang, C-K., Tang, C-H. and Lee, T-H.** (2015). Transcriptomic analysis of  
736 metabolic pathways in milkfish that respond to salinity and temperature changes. *PLoS*  
737 *ONE*. **10**, e0134959.  
738  
739 **Huang, B., Zhang, L., Tang, X., Zhang, G. and Li, L.** (2016). Genome-wide analysis  
740 of alternative splicing provides insights into stress adaptation of the Pacific oyster. *Mar.*  
741 *Biotechnol.* **18**, 598-609.  
742  
743 **Iida, K., Seki, M., Sakurai, T., Satou, M., Akiyama, K., Toyoda, T., Konagaya, A.**  
744 **and Shinozaki, K.** (2004). Genome-wide analysis of alternative pre-mRNA splicing in  
745 *Arabidopsis thaliana* based on full-length cDNA sequences. *Nucleic Acids Res.* **32**,  
746 5096-5103.  
747  
748 **Ikeda, D., Koyama, H., Mizusawa, N., Kan-no, N., Tan, E., Asakawa, S. and**  
749 **Watabe, S.** (2017). Global gene expression analysis of the muscle tissues of medaka  
750 acclimated to low and high environmental temperatures. *Comp. Biochem. Physiol. D.* **24**,  
751 19-28.  
752  
753 **Itoi, S., Kinoshita, S., Kikuchi, K. and Watabe, S.** (2003). Changes of carp F<sub>0</sub>F<sub>1</sub>-  
754 ATPase in association with temperature acclimation. *Am. J. Physiol. Regul. Integr.*  
755 *Comp. Physiol.* **284**, 153-163.  
756  
757 **Jakšić, A. M. and Schlötterer, C.** (2016). The interplay of temperature and genotype on  
758 patterns of alternative splicing in *Drosophila melanogaster*. *Genetics.* **204**, 315-325.  
759  
760 **Jayasundara, N., Gardiner, L. D. and Block, B. A.** (2013). Effects of temperature  
761 acclimation on Pacific bluefin tuna (*Thunnus orientalis*) cardiac transcriptome. *Am. J.*  
762 *Physiol. Regul. Integr. Comp. Physiol.* **305**, 1010-1020.  
763  
764 **Jayasundara, N., Tomanek, L., Dowd, W. W. and Somero, G. N.** (2015). Proteomic  
765 analysis of cardiac response to thermal acclimation in the eurythermal goby fish  
766 *Gillichthys mirabilis*. *J. Exp. Biol.* **218**, 1359-1372.  
767  
768 **Johnston, I. A., Fleming, J. D. and Crockford, T.** (1990). Thermal acclimation and  
769 muscle contractile properties in cyprinid fish. *Am. J. Physiol. Regul. Integr. Comp.*  
770 *Physiol.* **259**, 231-236.  
771  
772 **Johnston, I. A. and Temple, G. K.** (2002). Thermal plasticity of skeletal muscle  
773 phenotype in ectothermic vertebrates and its significance for locomotory behaviour. *J.*  
774 *Exp. Biol.* **205**, 2305-2322.  
775

- 776 **Lazar, G. and Goodman, H. M.** (2000). The Arabidopsis splicing factor SR1 is  
777 regulated by alternative splicing. *Plant Mol. Biol.* **42**, 571-581.  
778
- 779 **Liang, L., Chang, Y., He, X. and Tang, R.** (2015). Transcriptome analysis to identify  
780 cold-responsive genes in amur carp (*Cyprinus carpio haematopterus*). *PLoS ONE.* **10**,  
781 e0130526.  
782
- 783 **Lin, Y., Golovnina, K., Chen, Z-X., Lee, H. N., Serrano Negron, Y. L., Sultana, H.,**  
784 **Oliver, B. and Harbison, S. T.** (2016). Comparison of normalization and differential  
785 expression analyses using RNA-Seq data from 726 individual *Drosophila melanogaster*.  
786 *BMC Genomics.* **17**, 28.  
787
- 788 **Liscovitch-Brauer, N., Alon, S., Porath, H. T., Elstein, B., Unger, R., Ziv, T.,**  
789 **Admon, A., Levanon, E. Y., Rosenthal, J. J. and Eisenberg, E.** (2017). Trade-off  
790 between transcriptome plasticity and genome evolution in cephalopods. *Cell.* **169**, 191-  
791 202.  
792
- 793 **Long, Y., Li, L., Li, Q., He, X. and Cui, Z.** (2012). Transcriptomic characterization of  
794 temperature stress responses in larval zebrafish. *PLoS ONE.* **7**, e37209.  
795
- 796 **Long, Y., Song, G., Yan, J., He, X. and Cui, Z.** (2013). Transcriptomic characterization  
797 of cold acclimation in larval zebrafish. *BMC Genomics.* **14**, 612.  
798
- 799 **Love, M. I., Huber, W. and Anders, S.** (2014). Moderated estimation of fold change  
800 and dispersion for RNA-seq data with DESeq2. *Genome Biol.* **15**, 550.  
801
- 802 **Malone, A. M., Cozzi, R. R. and Marshall, W. S.** (2015). Cold acclimation allows  
803 regulation of chloride secretion in a eurythermic teleost fish *Fundulus*  
804 *heteroclitus*. *Comp. Biochem. Physiol. A.* **180**, 68-74.  
805
- 806 **Mandic, M., Ramon, M. L., Gracey, A. Y. and Richards, J. G.** (2014). Divergent  
807 transcriptional patterns are related to differences in hypoxia tolerance between the  
808 intertidal and the subtidal sculpins. *Mol. Ecol.* **23**, 6091-6103.  
809
- 810 **Metzger, D. C. H. and Schulte, P. M.** (2016). Maternal stress has divergent effects on  
811 gene expression patterns in the brains of male and female threespine stickleback. *Proc. R.*  
812 *Soc. Lond. B.* **283**, 20161734.  
813
- 814 **Metzger, D. C. H. and Schulte, P. M.** (2018). Similarities in temperature-dependent  
815 gene expression plasticity across timescales in threespine stickleback (*Gasterosteus*  
816 *aculeatus*). *Mol. Ecol.* **27**, 2381-2396.  
817
- 818 **Meyer, M., Plass, M., Pérez-Valle, J., Eyra, E. and Vilardell, J.** (2011). Deciphering  
819 3' ss selection in the yeast genome reveals an RNA thermosensor that mediates alternative  
820 splicing. *Mol. Cell.* **43**, 1033-1039.  
821

- 822 **Mihailovich, M., Militti, C., Gabaldón, T. and Gebauer, F.** (2010). Eukaryotic cold  
823 shock domain proteins: highly versatile regulators of gene expression. *Bioessays*. **32**,  
824 109-118.  
825
- 826 **Mininni, A. N., Milan, M., Ferrareso, S., Petochi, T., Di Marco, P., Marino, G.,**  
827 **Livi, S., Romualdi, C., Bargelloni, L. and Patarnello, T.** (2014). Liver transcriptome  
828 analysis in gilthead sea bream upon exposure to low temperature. *BMC Genomics*. **15**,  
829 765.  
830
- 831 **Modrek, B. and Lee, C.** (2002). A genomic view of alternative splicing. *Nature*  
832 *Genet.* **30**, 13.  
833
- 834 **Montiel-Gonzalez, M. F., Vallecillo-Viejo, I. C. and Rosenthal, J. J. C.** (2016). An  
835 efficient system for selectively altering genetic information in mRNAs. *Nucleic Acids*  
836 *Res.* **44**, e157.  
837
- 838 **Moreno-Hagelsieb, G. and Latimer, K.** (2007). Choosing BLAST options for better  
839 detection of orthologs as reciprocal best hits. *Bioinformatics*. **24**, 319-324.  
840
- 841 **Morris, M. R., Richard, R., Leder, E. H., Barrett, R. D., Aubin-Horth, N. and**  
842 **Rogers, S. M.** (2014). Gene expression plasticity evolves in response to colonization of  
843 freshwater lakes in threespine stickleback. *Mol. Ecol.* **23**, 3226-3240.  
844
- 845 **Moya, A., Huisman, L., Ball, E. E., Hayward, D. C., Grasso, L. C., Chua, C. M.,**  
846 **Woo, H. N., Gattuso, J. P., Foret, S. and Miller, D. J.** (2012). Whole transcriptome  
847 analysis of the coral *Acropora millepora* reveals complex responses to CO<sub>2</sub>-driven  
848 acidification during the initiation of calcification. *Mol. Ecol.* **21**, 2440-2454.  
849
- 850 **Nishikura, K.** (2016). A-to-I editing of coding and non-coding RNAs by ADARs. *Nat.*  
851 *Rev. Mol. Cell Biol.* **17**, 83.  
852
- 853 **Palusa, S. G., Ali, G. S. and Reddy, A. S.** (2007). Alternative splicing of pre-mRNAs of  
854 Arabidopsis serine/arginine-rich proteins: regulation by hormones and stresses. *Plant J.*  
855 **49**, 1091-1107.  
856
- 857 **Papasaikas, P. and Valcárcel, J.** (2016). The spliceosome: the ultimate RNA chaperone  
858 and sculptor. *Trends Biochem. Sci.* **41**, 33-45.  
859
- 860 **Polley, S. D., Tikku, P. E., Trueman, R. T., Caddick, M. X., Morozov, I. Y. and**  
861 **Cossins, A. R.** (2003). Differential expression of cold- and diet-specific genes encoding  
862 two carp liver delta 9-acyl-CoA desaturase isoforms. *Am. J. Physiol. Regul. Integr.*  
863 *Comp. Physiol.* **284**, 41-50.  
864
- 865 **Precht, H.** (1958). Concepts of the temperature adaptation of unchanging reaction  
866 systems of cold-blooded animals. In *Physiological Adaptations* (ed. C. L. Prosser), pp.  
867 50-78. Washington D.C.: American Physiology Society.

- 868  
869 **R Core Team** (2017) *R: A language and environment for statistical computing*. Vienna,  
870 Austria: R Foundation for Statistical Computing. <https://www.R-project.org/>  
871
- 872 **Rebl, A., Verleih, M., Köbis, J. M., Kühn, C., Wimmers, K., Köllner, B. and**  
873 **Goldammer, T.** (2013). Transcriptome profiling of gill tissue in regionally bred and  
874 globally farmed rainbow trout strains reveals different strategies for coping with thermal  
875 stress. *Mar. Biotechnol.* **15**, 445-460.  
876
- 877 **Reddy, A. S., Marquez, Y., Kalyna, M. and Barta, A.** (2013). Complexity of the  
878 alternative splicing landscape in plants. *Plant Cell*. tpc-113.  
879
- 880 **Reid, N. M., Proestou, D. A., Clark, B. W., Warren, W. C., Colbourne, J. K., Shaw,**  
881 **J. R., Karchner, S. I., Hahn, M. E., Nacci, D., Oleksiak, M. F. and Crawford, D. L.**  
882 (2016). The genomic landscape of rapid repeated evolutionary adaptation to toxic  
883 pollution in wild fish. *Science*. **354**, 1305-1308.  
884
- 885 **Robinson, M. D., McCarthy, D. J. and Smyth, G. K.** (2010). edgeR: a Bioconductor  
886 package for differential expression analysis of digital gene expression data.  
887 *Bioinformatics*. **26**, 139-140.  
888
- 889 **Rosenthal, J. J.** (2015). The emerging role of RNA editing in plasticity. *J. Exp.*  
890 *Biol.* **218**, 1812-1821.  
891
- 892 **Sano, Y., Shiina, T., Naitou, K., Nakamori, H. and Shimizu, Y.** (2015). Hibernation-  
893 specific alternative splicing of the mRNA encoding cold-inducible RNA-binding protein  
894 in the hearts of hamsters. *Biochem. Biophys. Res. Commun.* **462**, 322-325.  
895
- 896 **Schlichting, C. D. and Pigliucci, M.** (1993). Control of phenotypic plasticity via  
897 regulatory genes. *Am. Nat.* **142**, 366-370.  
898
- 899 **Schlichting, C. D. and Smith, H.** (2002). Phenotypic plasticity: linking molecular  
900 mechanisms with evolutionary outcomes. *Evol. Ecol.* **16**, 189-211.  
901
- 902 **Schoville, S. D., Barreto, F. S., Moy, G. W., Wolff, A. and Burton, R. S.** (2012).  
903 Investigating the molecular basis of local adaptation to thermal stress: population  
904 differences in gene expression across the transcriptome of the copepod *Tigriopus*  
905 *californicus*. *BMC Evol. Biol.* **12**, 170.  
906
- 907 **Schulte, P. M.** (2004). Changes in gene expression as biochemical adaptations to  
908 environmental change: a tribute to Peter Hochachka. *Comp. Biochem. Physiol. B.* **139**,  
909 519-529.  
910
- 911 **Schulte, P. M., Healy, T. M., and Fangue, N. A.** (2011). Thermal performance curves,  
912 phenotypic plasticity, and the time scales of temperature exposure. *Integr. Comp. Biol.*  
913 icr097.

- 914  
915 **Scott, G. R. and Johnston, I. A.** (2012). Temperature during embryonic development  
916 has persistent effects on thermal acclimation capacity in zebrafish. *Proc. Natl. Acad. Sci.*  
917 *USA*. **109**, 14247-14252.
- 918  
919 **Seebacher, F., White, C. R. and Franklin, C. E.** (2015). Physiological plasticity  
920 increases resilience of ectothermic animals to climate change. *Nat. Clim. Change*. **5**, 61-  
921 66.
- 922  
923 **Somero, G. N.** (2018). RNA thermosensors: how might animals exploit their regulatory  
924 potential? *J. Exp. Biol.* **221**, jeb162842.
- 925  
926 **Tan, S., Wang, W., Zhong, X., Tian, C., Niu, D., Bao, L., Zhou, T., Jin, Y., Yang, Y.,**  
927 **Yuan, Z. and Gao, D.** (2018). Increased alternative splicing as a host response to  
928 *Edwardsiella ictaluri* infection in catfish. *Mar. Biotechnol.*  
929 <https://doi.org/10.1007/s10126-018-9844-2>
- 930  
931 **Tapial, J., Ha, K. C., Sterne-Weiler, T., Gohr, A., Braunschweig, U., Hermoso-**  
932 **Pulido, A., Quesnel-Vallières, M., Permanyer, J., Sodaei, R., Marquez, Y. and**  
933 **Cozzuto, L.** (2017). An atlas of alternative splicing profiles and functional associations  
934 reveals new regulatory programs and genes that simultaneously express multiple major  
935 isoforms. *Genome Res.* gr-220962.
- 936  
937 **Thatcher, S. R., Danilevskaya, O. N., Meng, X., Beatty, M., Zastrow-Hayes, G.,**  
938 **Harris, C., Van Allen, B., Habben, J. E. and Li, B.** (2015). Genome-wide analysis of  
939 alternative splicing during development and drought stress in *Zea mays*. *Plant Physiol.*  
940 pp-01267.
- 941  
942 **Travis, J.** (1994). Evaluating the adaptive role of morphological plasticity. In *Ecological*  
943 *Morphology* (ed. P. C. Wainwright and S. M. Reilly), pp. 99-122. Chicago, IL: University  
944 of Chicago Press.
- 945  
946 **Tress, M. L., Abascal, F. and Valencia, A.** (2017). Alternative splicing may not be the  
947 key to proteome complexity. *Trends Biochem. Sci.* **42**, 98-110.
- 948  
949 **Vergauwen, L., Benoot, D., Blust, R. and Knapen, D.** (2010). Long-term warm or cold  
950 acclimation elicits a specific transcriptional response and affects energy metabolism in  
951 zebrafish. *Comp. Biochem. Physiol. A*. **157**, 149-157.
- 952  
953 **Verleih, M., Borchel, A., Krasnov, A., Rebl, A., Korytář, T., Kühn, C. and**  
954 **Goldammer, T.** (2015). Impact of thermal stress on kidney-specific gene expression in  
955 farmed regional and imported rainbow trout. *Mar. Biotechnol.* **17**, 576-592.
- 956  
957 **Vornanen, M., Hassinen, M., Koskinen, H. and Krasnov, A.** (2005). Steady-state  
958 effects of temperature acclimation on the transcriptome of the rainbow trout heart. *Am.*  
959 *J. Physiol. Regul. Integr. Comp. Physiol.* **289**, 1177-1184.

- 960  
961 **Wang, Q., Tan, X., Jiao, S., You, F. and Zhang, P.-J.** (2014). Analyzing cold tolerance  
962 mechanism in transgenic zebrafish (*Danio rerio*). *PLoS ONE*. **9**, e102492.  
963  
964 **West-Eberhard, M. J.** (2003). *Developmental Plasticity and Evolution*. New York, NY:  
965 Oxford University Press.  
966  
967 **Xia, J. H., Li, H. L., Li, B. J., Gu, X. H. and Lin, H. R.** (2018). Acute hypoxia stress  
968 induced abundant differential expression genes and alternative splicing events in heart of  
969 tilapia. *Gene*. **639**, 52-61.  
970  
971 **Young, M. D., Wakefield, M. J., Smyth, G. K. and Oshlack, A.** (2010). Gene ontology  
972 analysis for RNA-seq: accounting for selection bias. *Genome Biol*. **11**, R14.  
973  
974 **Zhao, X., Yu, H., Kong, L. and Li, Q.** (2012). Transcriptomic responses to salinity  
975 stress in the Pacific oyster *Crassostrea gigas*. *PLoS ONE*. **7**, e46244.  
976  
977 **Figure legends**  
  
978 **Figure 1. Venn diagrams displaying the numbers of significant differentially**  
979 **expressed (DE) and alternatively spliced (AS) genes as a result of cold acclimation in**  
980 ***Fundulus heteroclitus* (A, orange), *Gasterosteus aculeatus* (B, green) and *Danio rerio***  
981 **(C, purple). DE genes: dashed outline; AS genes: solid outline.**  
982  
983 **Figure 2. GO biological processes demonstrating significant enrichment for genes**  
984 **demonstrating alternative splicing in killifish (orange), stickleback (green) and**  
985 **zebrafish (purple). Enriched GO terms are listed on the y-axis. Horizontal bars indicate**  
986 **inverse log *p*-values for each term in each species. If a GO term is missing a bar for a**  
987 **species, that term was not significantly enriched in the missing species. Numbers to the**  
988 **right of each bar display the number of alternatively spliced genes in that species with the**  
989 **corresponding GO annotation.**  
990  
991 **Figure 3. Venn diagrams displaying the numbers of common differentially**  
992 **expressed (DE; A, dashed outline) or alternatively spliced (AS; B, solid outline)**  
993 **genes as a result of cold acclimation among killifish (orange), stickleback (green)**  
994 **and zebrafish (purple). Numbers of DE or AS genes common in all three species are in**  
995 **bold.**  
996  
997 **Figure 4. Plots of relative exon expression (usage) in cold-acclimated (solid blue**  
998 **lines) and warm-acclimated (solid red lines) fish for orthologs of aldolase (A, B, C)**  
999 **and cold shock domain-containing protein E1 (D, E, F) as a result of cold**  
1000 **acclimation in killifish (A, D), stickleback (B, E) and zebrafish (C, F). Exons with**  
1001 **significant differential exon usage are indicated by vertical blue or red dashed lines (blue:**  
1002 **higher usage in cold-acclimated fish; red: higher usage in warm-acclimated fish). A**  
1003 **graphical summary of exon usage for the flattened gene model for each gene and species**

1004 is displayed below each plot (grey boxes: exons without differential usage; blue boxes:  
1005 exons with higher expression in cold-acclimated fish; red boxes: exons with higher  
1006 expression in warm-acclimated fish; joining lines: introns).  
1007

1008 Table 1. Significantly enriched gene ontology (GO) annotations for differentially  
 1009 expressed (DE) or alternatively spliced (AS) genes that were identified in all species.

| Common response | GO category                      | GO term                                                      | GO ontology |
|-----------------|----------------------------------|--------------------------------------------------------------|-------------|
| DE genes        | GO:1901800                       | positive regulation of proteasomal protein catabolic process | BP          |
|                 | GO:0006511                       | ubiquitin-dependent protein catabolic process                | BP          |
|                 | GO:0030433                       | ubiquitin-dependent ERAD pathway                             | BP          |
|                 | GO:0006457                       | protein folding                                              | BP          |
|                 | GO:0000502                       | proteasome complex                                           | CC          |
|                 | GO:0005839                       | proteasome core complex                                      | CC          |
|                 | GO:0019773                       | proteasome core complex, alpha-subunit complex               | CC          |
|                 | GO:0031595                       | nuclear proteasome complex                                   | CC          |
|                 | GO:0008540                       | proteasome regulatory particle, base subcomplex              | CC          |
|                 | GO:0031597                       | cytosolic proteasome complex                                 | CC          |
|                 | GO:0005634                       | nucleus                                                      | CC          |
|                 | GO:0071013                       | catalytic step 2 spliceosome                                 | CC          |
|                 | GO:0005838                       | proteasome regulatory particle                               | CC          |
|                 | GO:0004298                       | threonine-type endopeptidase activity                        | MF          |
|                 | GO:0005524                       | ATP binding                                                  | MF          |
|                 | GO:0003723                       | RNA binding                                                  | MF          |
|                 | GO:0036402                       | proteasome-activating ATPase activity                        | MF          |
|                 | GO:0016887                       | ATPase activity                                              | MF          |
|                 | GO:0051082                       | unfolded protein binding                                     | MF          |
|                 | GO:0004004                       | ATP-dependent RNA helicase activity                          | MF          |
| GO:0008307      | structural constituent of muscle | MF                                                           |             |
| AS genes        | GO:0006941                       | striated muscle contraction                                  | BP          |
|                 | GO:0005859                       | muscle myosin complex                                        | CC          |
|                 | GO:0030018                       | Z disc                                                       | CC          |



1010 Table 2. Ortholog groups for the 29 common alternatively spliced (AS) genes identified in all species.

| <i>F. heteroclitus</i><br>gene ID | <i>F. heteroclitus</i><br>gene name | <i>G. aculeatus</i><br>gene ID           | <i>G. aculeatus</i><br>gene name | <i>D. rerio</i><br>gene ID | <i>D. rerio</i><br>gene name |
|-----------------------------------|-------------------------------------|------------------------------------------|----------------------------------|----------------------------|------------------------------|
| XM_012850409.1                    | Unannotated                         | ENSGACG00000007397                       | <i>atp2a1l</i>                   | ENSDARG00000005122         | <i>atp2a2b</i>               |
| XM_012882589.1                    | Unannotated                         |                                          |                                  | ENSDARG00000035458         | <i>atp2a1l</i>               |
| XM_012851609.1                    | Unannotated                         | ENSGACG00000016054                       | <i>eif4a2</i>                    | ENSDARG00000016477         | <i>eif4a2</i>                |
| XM_012861028.1                    | <i>eif4a2</i>                       |                                          |                                  |                            |                              |
| XM_012853116.1                    | Unannotated                         | ENSGACG00000004209                       | <i>myom1b</i>                    | ENSDARG00000104836         | <i>myom1b</i>                |
|                                   |                                     | ENSGACG00000017095                       | <i>myom1a</i>                    |                            |                              |
| XM_012853388.1                    | Unannotated                         | ENSGACG00000002145<br>ENSGACG00000014960 | <i>smyhc1</i><br><i>vmhc</i>     | ENSDARG00000098747         | <i>wdr48a</i>                |
| XM_012882788.1                    | Unannotated                         |                                          |                                  |                            |                              |
| XM_012882790.1                    | Unannotated                         |                                          |                                  |                            |                              |
| XM_012853621.1                    | <i>dst</i>                          | ENSGACG00000006193                       | <i>dst</i>                       | ENSDARG00000101858         | <i>dst</i>                   |
| XM_012855227.1                    | <i>aldoc</i>                        | ENSGACG00000007727                       | <i>aldoa</i>                     | ENSDARG00000011665         | <i>aldoaa</i>                |
| XM_012855337.1                    | Unannotated                         | ENSGACG00000020663                       | <i>ryr1a</i>                     | ENSDARG00000023797         | <i>ryr1b</i>                 |
| XM_012872435.1                    | Unannotated                         |                                          |                                  |                            |                              |
| XM_012875795.1                    | Unannotated                         |                                          |                                  |                            |                              |
| XM_012858979.1                    | <i>obs1l</i>                        | ENSGACG00000002287                       | Unannotated                      | ENSDARG00000077388         | <i>obs1b</i>                 |
| XM_012859198.1                    | Unannotated                         | ENSGACG00000004833                       | <i>capn1a</i>                    | ENSDARG00000055338         | <i>capn1_1</i>               |
| XM_012861416.1                    | <i>ank2</i>                         | ENSGACG00000001623                       | <i>ank2b</i>                     | ENSDARG00000043313         | <i>ank2b</i>                 |
| XM_012861906.1                    | <i>csdel</i>                        | ENSGACG00000004544                       | <i>csdel</i>                     | ENSDARG00000074758         | <i>csdel</i>                 |
| XM_012862064.1                    | <i>coll2a1</i>                      | ENSGACG00000006800                       | <i>coll2a1</i>                   | ENSDARG00000078322         | <i>coll2a1a</i>              |
| XM_012862152.1                    | <i>pfkfb4</i>                       | ENSGACG00000000815                       | <i>pfkfb4b</i>                   | ENSDARG00000055540         | <i>pfkfb4a</i>               |
| XM_012863717.1                    | Unannotated                         | ENSGACG00000009822                       | <i>pfkfb4a</i>                   |                            |                              |
| XM_012862871.1                    | <i>fam13a</i>                       | ENSGACG00000017308                       | <i>fam13a</i>                    | ENSDARG00000075564         | <i>fam13a</i>                |
|                                   |                                     |                                          |                                  | ENSDARG00000076779         | <i>fam13b</i>                |
| XM_012863539.1                    | <i>osbp2</i>                        | ENSGACG00000008560                       | Unknown                          | ENSDARG00000022772         | <i>osbp2</i>                 |
| XM_012865180.1                    | Unannotated                         | ENSGACG00000005023                       | <i>mybphb</i>                    | ENSDARG00000003081         | <i>mybphb</i>                |
|                                   |                                     |                                          |                                  | ENSDARG00000058799         | <i>mybpha</i>                |
| XM_012866471.1                    | <i>cacna1s</i>                      | ENSGACG00000008900                       | <i>cacna1sb</i>                  | ENSDARG00000042552         | <i>cacna1sb</i>              |
| XM_012866628.1                    | <i>usp28</i>                        | ENSGACG00000020768                       | <i>usp28</i>                     | ENSDARG00000008880         | <i>usp28</i>                 |
|                                   |                                     |                                          |                                  | ENSDARG00000012314         | <i>usp25</i>                 |
| XM_012868087.1                    | <i>phkg1</i>                        | ENSGACG00000008901                       | <i>phkg1b</i>                    | ENSDARG00000069498         | <i>phkg1b</i>                |
| XM_012869963.1                    | Unannotated                         | ENSGACG00000006585                       | <i>smyd1b</i>                    | ENSDARG00000091253         | <i>smyd1b</i>                |
| XM_012870952.1                    | Unannotated                         | ENSGACG00000002902                       | <i>myh13_3</i>                   | ENSDARG00000012944         | <i>myhz2</i>                 |
| XM_012870969.1                    | Unannotated                         | ENSGACG00000002955                       | Unannotated                      | ENSDARG00000095930         | <i>myha</i>                  |
| XM_012872715.1                    | Unannotated                         | ENSGACG00000010018                       | <i>myh13_2</i>                   | ENSDARG00000102414         | <i>myh13</i>                 |
| XM_012871229.1                    | <i>ammecr1</i>                      | ENSGACG000000020290                      | <i>ammecr1</i>                   | ENSDARG00000012892         | <i>ammecr1</i>               |
| XM_012873992.1                    | <i>phkb</i>                         | ENSGACG00000014907                       | Unannotated                      | ENSDARG00000078284         | <i>phkb</i>                  |
| XM_012876760.1                    | <i>flnc</i>                         | ENSGACG00000013098                       | Unannotated                      | ENSDARG00000074201         | <i>flna</i>                  |
| XM_012878659.1                    | Unannotated                         | ENSGACG00000011469                       | <i>frya</i>                      | ENSDARG00000056001         | <i>fryb</i>                  |
| XM_012879504.1                    | <i>ddx3x</i>                        | ENSGACG00000008206                       | <i>ddx3a</i>                     | ENSDARG00000005774         | <i>ddx3b</i>                 |
|                                   |                                     | ENSGACG00000014407                       | Unannotated                      |                            |                              |
| XM_012880261.1                    | Unannotated                         | ENSGACG00000004200                       | <i>tnnt2e</i>                    | ENSDARG00000045822         | <i>tnnt2e</i>                |

1011

1012 Figure 1.  
1013

**A: *F. heteroclitus***

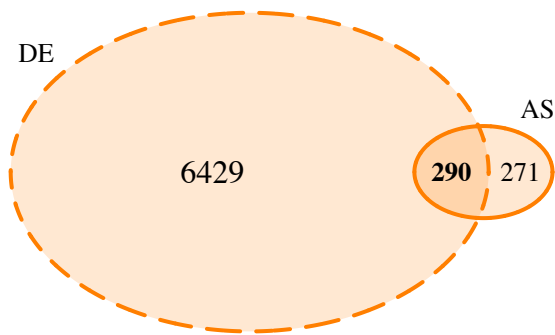

**B: *G. aculeatus***

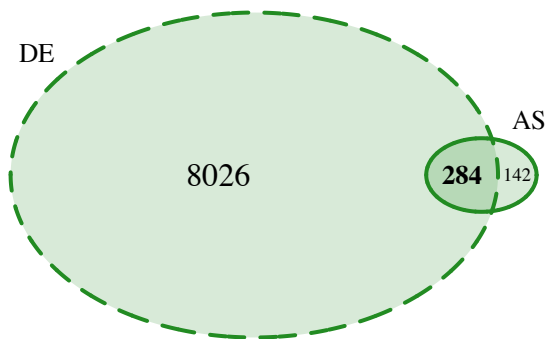

**C: *D. rerio***

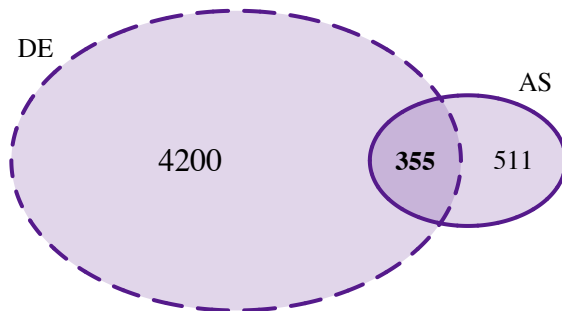

1014  
1015  
1016  
1017  
1018  
1019  
1020

**Figure 1. Venn diagrams displaying the numbers of significant differentially expressed (DE) and alternatively spliced (AS) genes as a result of cold acclimation in *Fundulus heteroclitus* (A, orange), *Gasterosteus aculeatus* (B, green) and *Danio rerio* (C, purple). DE genes: dashed outline; AS genes: solid outline.**

1021 Figure 2.  
1022

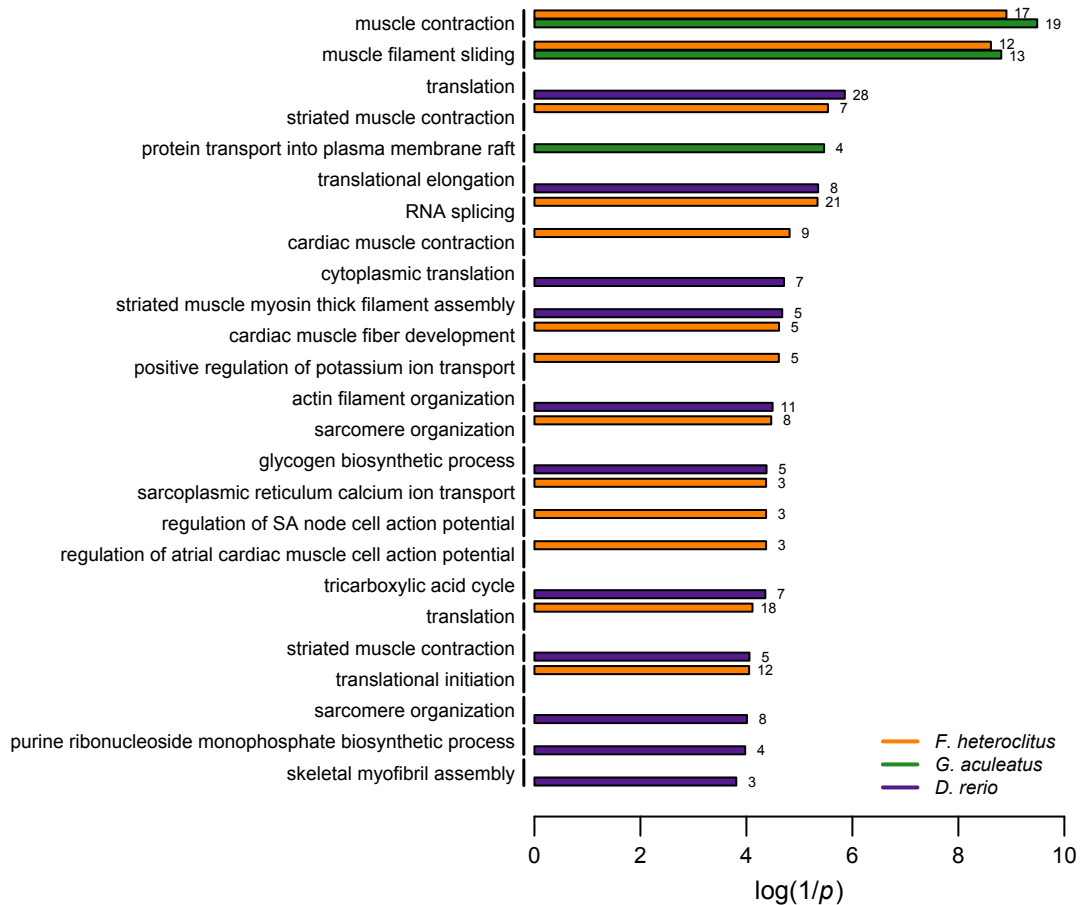

1023  
1024  
1025  
1026  
1027  
1028  
1029  
1030  
1031  
1032

**Figure 2. GO biological processes demonstrating significant enrichment for genes demonstrating alternative splicing in killifish (orange), stickleback (green) and zebrafish (purple).** Enriched GO terms are listed on the y-axis. Horizontal bars indicate inverse log  $p$ -values for each term in each species. If a GO term is missing a bar for a species, that term was not significantly enriched in the missing species. Numbers to the right of each bar display the number of alternatively spliced genes in that species with the corresponding GO annotation.

1033 Figure 3.  
1034

**A: Differentially expressed (DE) genes**

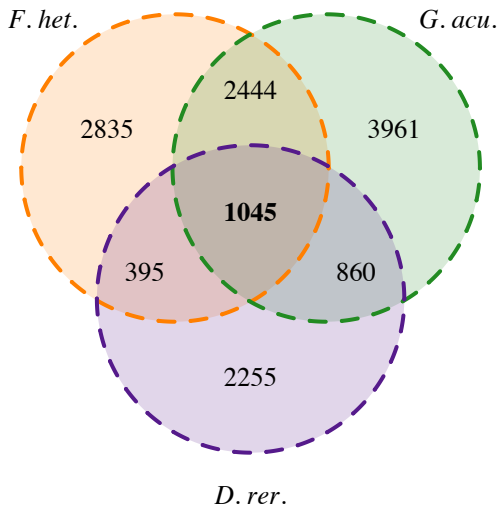

**B: Alternatively spliced (AS) genes**

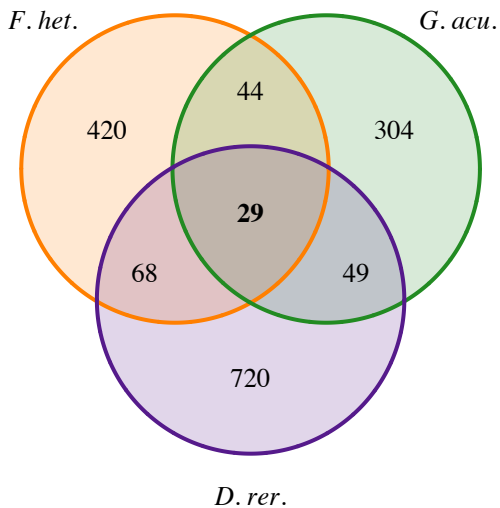

1035  
1036  
1037  
1038  
1039  
1040  
1041  
1042

**Figure 3. Venn diagrams displaying the numbers of common differentially expressed (DE; A, dashed outline) or alternatively spliced (AS; B, solid outline) genes as a result of cold acclimation among killifish (orange), stickleback (green) and zebrafish (purple). Numbers of DE or AS genes common in all three species are in bold.**

1043 Figure 4.  
1044

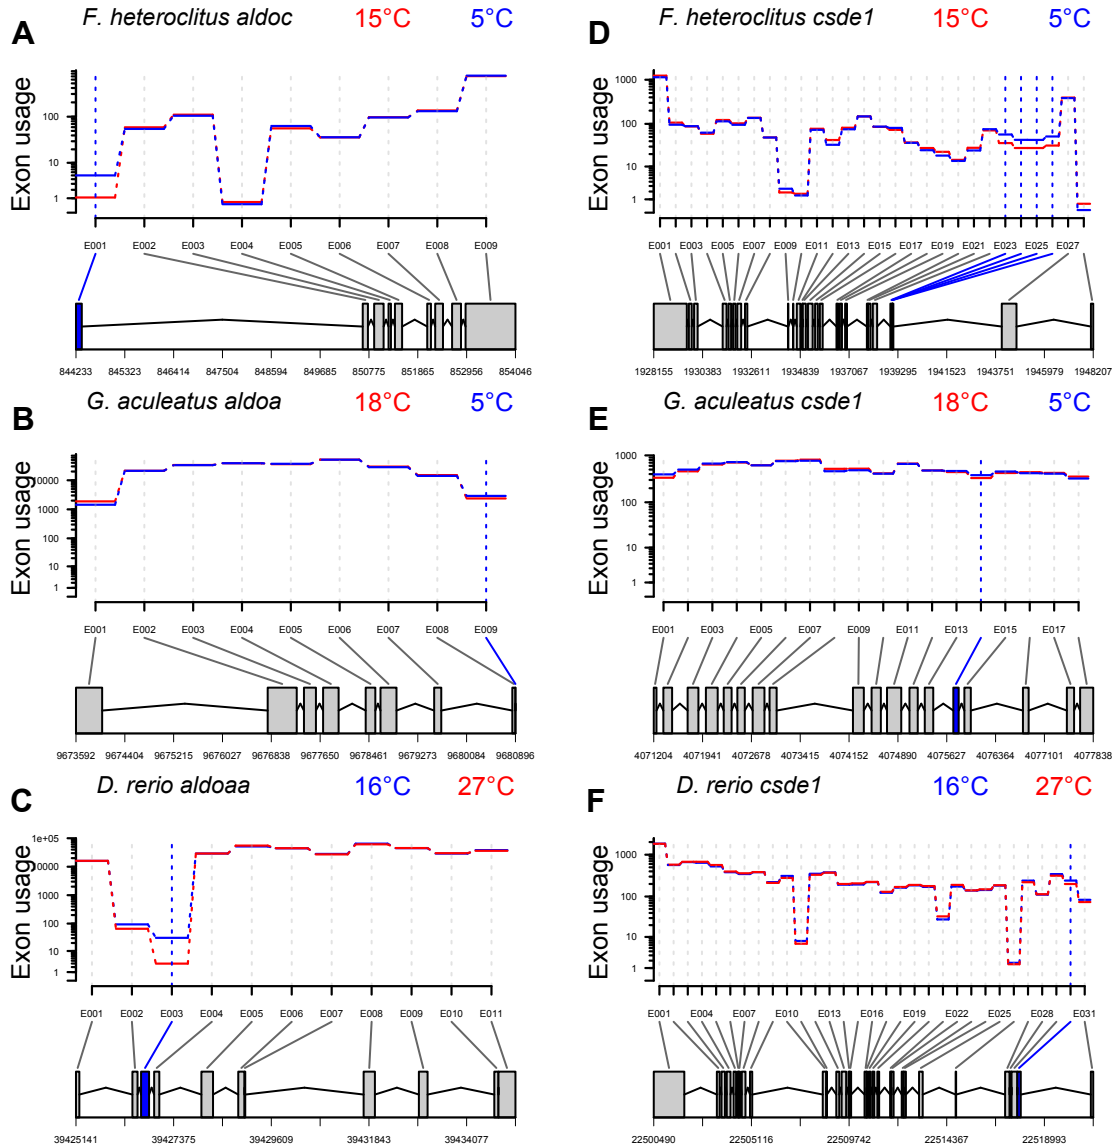

1045  
1046  
1047  
1048  
1049  
1050  
1051  
1052  
1053  
1054  
1055  
1056

**Figure 4. Plots of relative exon expression (usage) in cold-acclimated (solid blue lines) and warm-acclimated (solid red lines) fish for orthologs of aldolase (A, B, C) and cold shock domain-containing protein E1 (D, E, F) as a result of cold acclimation in killifish (A, D), stickleback (B, E) and zebrafish (C, F). Exons with significant differential exon usage are indicated by vertical blue or red dashed lines (blue: higher usage in cold-acclimated fish; red: higher usage in warm-acclimated fish). A graphical summary of exon usage for the flattened gene model for each gene and species is displayed below each plot (grey boxes: exons without differential usage; blue boxes: exons with higher expression in cold-acclimated fish; red boxes: exons with higher expression in warm-acclimated fish; joining lines: introns).**
